# Supplementary material for: Well-dispersed KRE3F10(RE = Sm–Lu, Y) nanocrystals: solvothermal synthesis and luminescence properties
Source: Royal Society of Chemistry journal article supplement (doi:10.1039/c1ce06087b), 2011-11-11
Supplement: c1ce06087b.pdf [file c1ce06087b.pdf]

## Electronic Supplementary Information

### Well-Dispersed $\text{KRE}_3\text{F}_{10}$ (RE = Sm-Lu, Y) Nanocrystals: Solvothermal Synthesis and Luminescence Properties

Chunxia Li<sup>†</sup>, Zhenhe Xu<sup>†</sup>, Dongmei Yang<sup>†</sup>, Ziyong Cheng<sup>†</sup>, Zhiyao Hou<sup>‡</sup>, Ping'an Ma<sup>†</sup> and Jun Lin<sup>\*†</sup>

<sup>†</sup>State Key Laboratory of Rare Earth Resource Utilization, Changchun Institute of Applied Chemistry, Chinese Academy of Sciences, Changchun 13002, P. R. China

<sup>‡</sup> College of Materials Science and Chemical Engineering, Harbin Engineering University, Harbin 150001, P. R. China

**Table S1 Summary of Crystal Structures, Space Groups, JCPDS, Morphologies, Sizes, and Average Crystallite size ( $D$ ) of  $\text{REF}_3$  (RE = La-Nd)**

| RE elements | Composition    | Crystal phase | Space group      | JCPDS   | Morphology | Average edge length or diameter [nm] | D (nm) from XRD |
|-------------|----------------|---------------|------------------|---------|------------|--------------------------------------|-----------------|
| La          | $\text{REF}_3$ | hexagonal     | $\bar{P}3c1$     | 32-0483 | nanoplate  | 18.0                                 | 14.2            |
| Ce          |                |               | $\bar{P}3c1$     | 38-0452 |            | 18.7                                 | 14.0            |
| Pr          |                |               | $\bar{P}3c1$     | 46-1167 |            | 19.9                                 | 21.5            |
| Nd          |                |               | $P6_3/mc$<br>$m$ | 09-0416 |            | 16.3                                 | 15.5            |

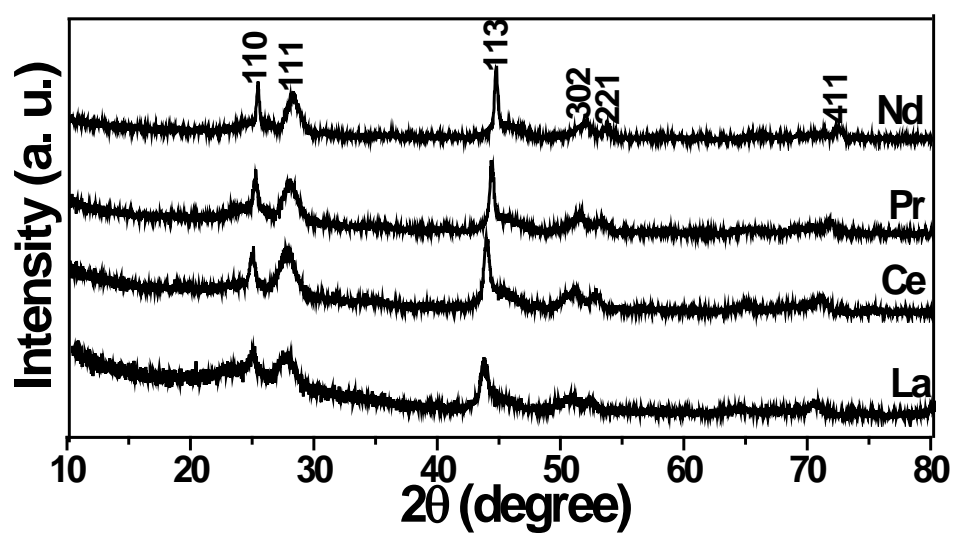

**Figure S1** XRD patterns of as-prepared REFe<sub>3</sub> (La to Nd) products with a hexagonal crystal structure.

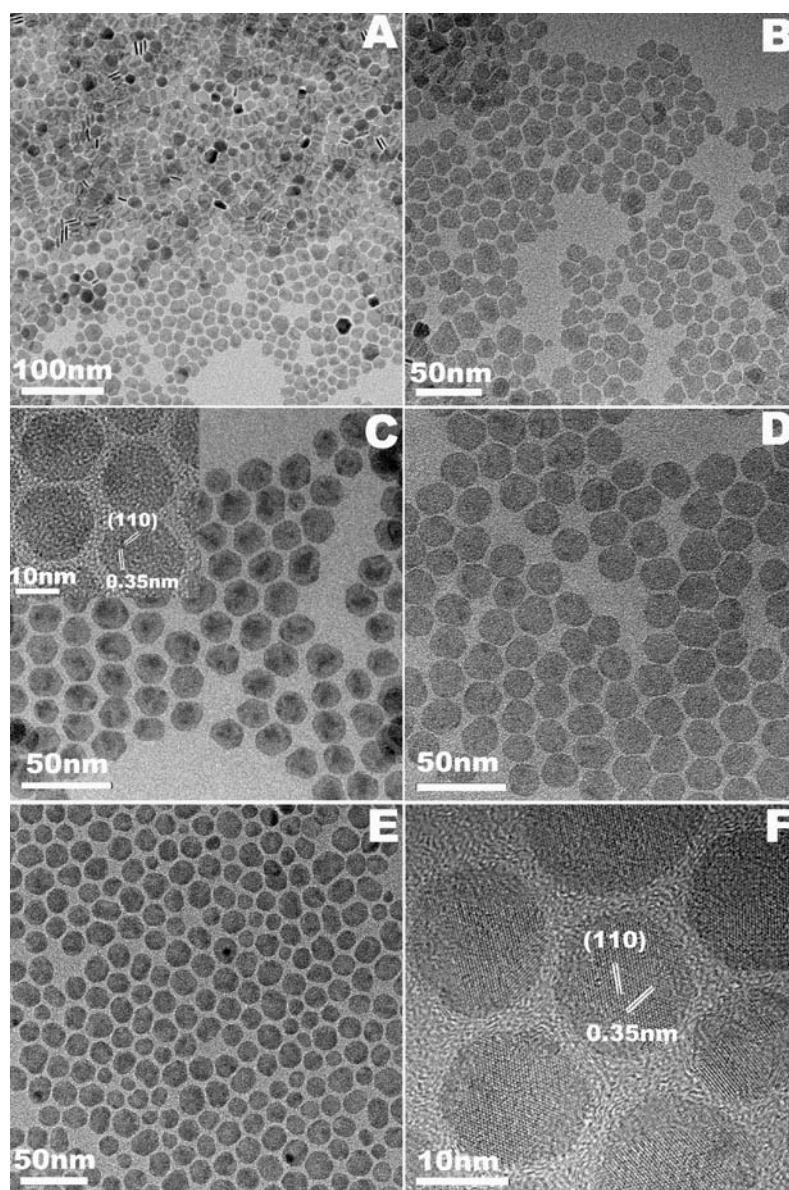

**Figure S2** TEM (A, B) of LaF<sub>3</sub>, TEM (C) and HRTEM (inset in C) of CeF<sub>3</sub>, TEM (D) of PrF<sub>3</sub> as well as TEM (E) and HRTEM (F) images of NdF<sub>3</sub>.
